# Supplementary material for: Endomucin inhibits VEGF-induced endothelial cell migration, growth, and morphogenesis by modulating VEGFR2 signaling
Source: PubMed Central journal article supplement (PMC5719432; doi:10.1038/s41598-017-16852-x), 2017-12-07
Supplement: 41598_2017_16852_MOESM1_ESM.pdf [file 41598_2017_16852_MOESM1_ESM.pdf]

**Endomucin inhibits VEGF-induced endothelial cell migration, growth, and morphogenesis by modulating VEGFR2 signaling**

Cindy Park-Windhol, PhD<sup>1,2</sup>; Yin-Shan Ng<sup>1,2</sup>; PhD; Jinling Yang, PhD<sup>1,2</sup>; Vincent Primo, BS<sup>1,2</sup>; Magali Saint-Geniez, PhD<sup>1,2,\*</sup>; Patricia A. D'Amore, PhD<sup>1,2,3,\*</sup>

<sup>1</sup>*Schepens Eye Research Institute/Massachusetts Eye and Ear, Boston, MA, USA*

<sup>2</sup>*Departments of Ophthalmology and <sup>3</sup>Pathology, Harvard Medical School, Boston, MA, USA*

*\*Magali Saint-Geniez, PhD and Patricia A. D'Amore, PhD are co-senior authors on this manuscript.*

## SUPPLEMENTAL FIGURES

**Table S1: Sequences for primers for qRT-PCR.**

|               | Forward                     | Reverse                    |
|---------------|-----------------------------|----------------------------|
| <i>hEMCN:</i> | 5'TGCAGGACTTTCTCCTTTTC3'    | 5'ATTTGTTCTGGTGGGTTTGT3'   |
| <i>hGAPDH</i> | 5'CAAATTCATGGCACCGTCA3'     | 5'GGAGTGGGTGTCGCTGTTGA3'   |
| <i>hHPRT1</i> | 5'CCTGGCGTCGTGATTAGTGAT3'   | 5'AGACGTTCAGTCCTGTCCATAA3' |
| <i>mEmcn</i>  | 5'AATACCAGGCATCGTGTCAGT3'   | 5'CTGATTCTCAGTCTTGTCTGGG3' |
| <i>mGapdh</i> | 5'GTGGCAAAGTGGAGATTGTTGCC3' | 5'GATGATGACCCGTTTGGCTCC3'  |
| <i>mHprt1</i> | 5'TCAGTCAACGGGGGACATAAA3'   | 5'GGGGCTGTA CTGCTTAACCAG3' |

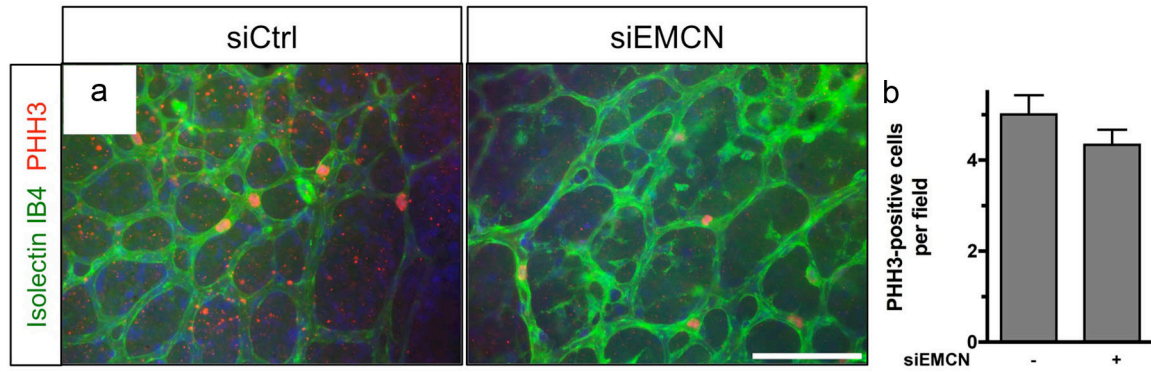

**Figure S1: Loss of EMCN shows a reduced apoptotic profile independent of proliferation.**

**(a)** Representative images of a P6 vasculature labeled for IB<sub>4</sub> (green) and mitosis (phospho-histone; PHH3, red) and nuclei (blue) 48 hr after intravitreal injection with siEMCN or siCtrl. **(b)** Quantification shows no change in the number of PHH3-positive cells in siEMCN injected eyes compared to control eyes. Scale bar, 100 μm.

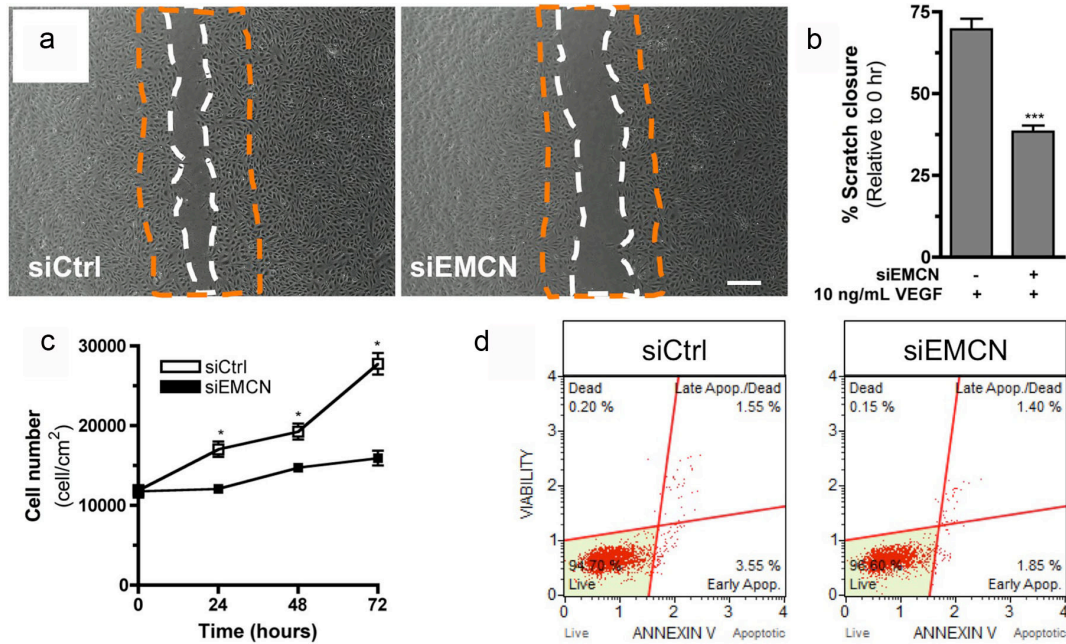

**Figure S2: EMCN controls EC migration and proliferation in HUVECs.** HUVECs were transfected with siCtrl or siEMCN. **(a, b)** Cell migration was measured by a wound assay and cell growth and viability were measured by **(c)** Trypan blue or assessed for cell death using a **(d)** Muse automated cell analyzer. **(a)** Representative images of the wound margins immediately (orange) and 10 hr (white) after scratch in response to 10 ng/mL VEGF. **(b)** Scratch closure was quantified at 10 hr and data are expressed as a % of the initial scratch width. **(c)** Graph showing cell number of siEMCN (closed black squares) and siCtrl (open squares) transfected cells 0, 24, 48, and 72 hr after treatment with VEGF (10 ng/mL) shows significant reduction in EC proliferation. **(d)** Representative plots of siEMCN and siCtrl experiments performed for annexin V detection shows non-apoptotic live (lower left: 7-AAD negative, apoptosis negative), non-apoptotic dead (upper left: 7-AAD positive, apoptosis negative), apoptotic live (lower right: 7-AAD negative, apoptosis positive), and apoptotic dead (upper right: 7-AAD positive, apoptosis positive) cells. \* $P < 0.05$ , \*\*\* $P < 0.001$  siEMCN vs siCtrl. Error bars represent SEM.

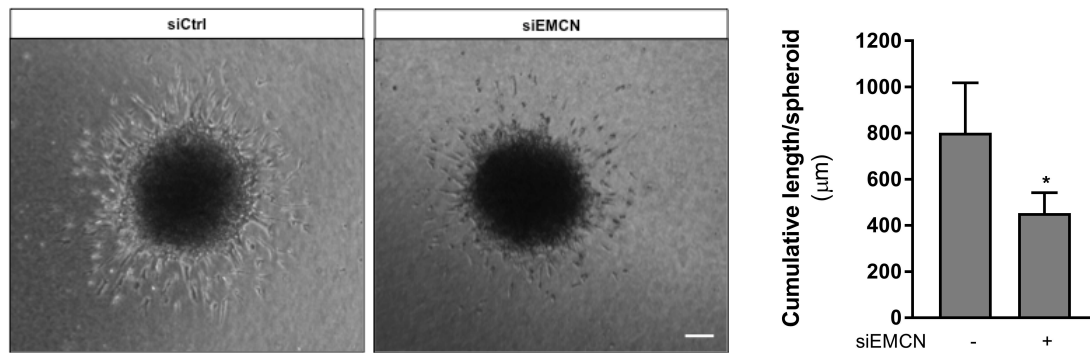

**Figure S3: EMCN knockdown attenuates capillary sprouting of endothelial cells in response to VEGF. (Left)** Representative images of angiogenic sprouting from spheroids generated from HRECs stimulated (12 hours) by VEGF (5 ng/ml). **(Right)** Quantification of total length of all sprouting processes originating from a single spheroid in the presence of VEGF (2-8 spheroids/well). Quantitative results are from three independent experiments. \* $P < 0.05$  siEMCN vs siCtrl. Error bars represent SEM. Scale bar, 100 µm.

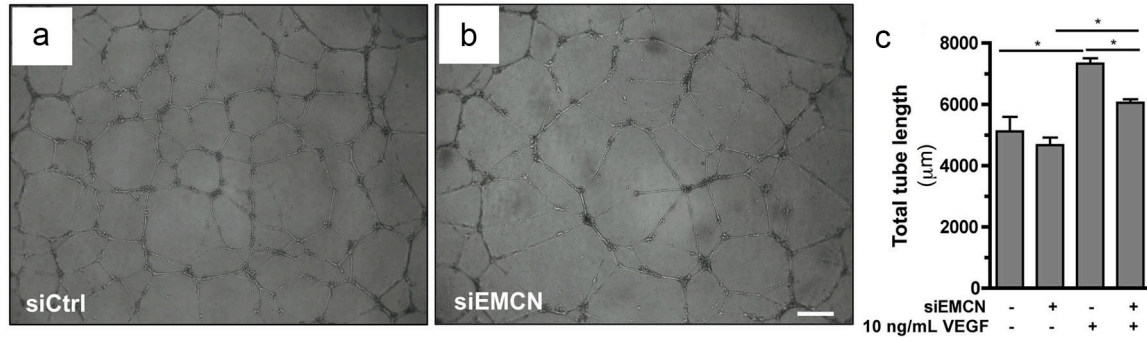

**Figure S4: Reduced levels of EMCN render HRECs unable to organize into vessel-like structures at later time points.** (a) siCtrl or (b) siEMCN cells were plated on polymerized BME in the presence of VEGF (10 ng/mL). Representative phase-contrast images after 24 hr are shown. (c) Quantification of total tube length was performed by Image J 24 hr after plating on BME in the presence and absence of VEGF shows knockdown of EMCN expression inhibits ECM-induced tube formation. Quantitative results are from three independent experiments. \* $P < 0.05$ , \*\*\* $P < 0.001$  siEMCN vs siCtrl or AdEMCN vs AdGFP; \* $P < 0.05$ , \*\* $P < 0.01$  VEGF vs no VEGF. Error bars represent SEM. Scale bar, 100 µm.

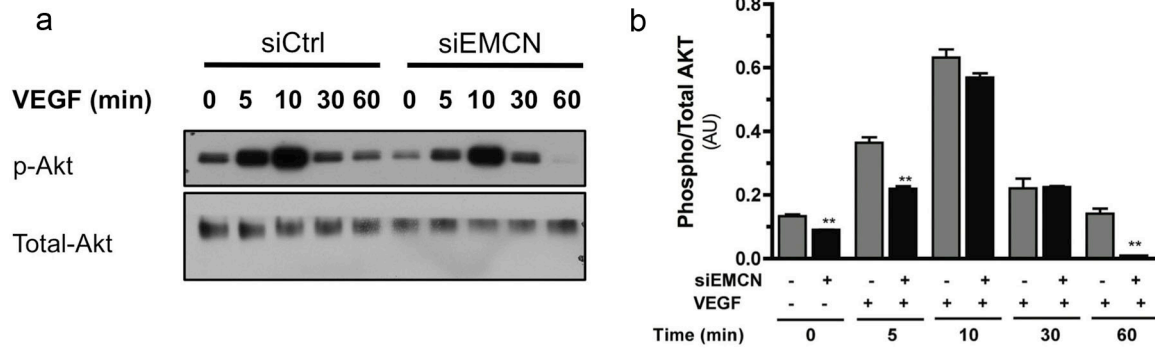

**Figure S5: EMCN inhibits VEGF-induced phosphorylation of Akt in HRECs. (a)** Immunoblot and **(b)** quantitative analysis of siCtrl and siEMCN cells stimulated with exogenous VEGF (10 ng/mL) at indicated time points and assessed for levels of phosphorylated and total Akt. **\*\* $P < 0.01$** . Error bars represent SEM. Cropped gels are displayed.
